# Supplementary material for: Regeneration of LiFePO4 from spent lithium-ion batteries via a facile process featuring acid leaching and hydrothermal synthesis
Source: Royal Society of Chemistry journal article supplement (doi:10.1039/d1gc00483b), 2021-01-01
Supplement: d1gc00483b1.pdf [file d1gc00483b1.pdf]

## Supporting information

# Regeneration of $\text{LiFePO}_4$ from spent lithium-ion battery by a facile process featuring acid leaching and hydrothermal synthesis

Yifan Song<sup>1,#</sup>, Boyi Xie<sup>2,#</sup>, Shaole Song<sup>1</sup>, Shuya Lei<sup>1</sup>, Wei Sun<sup>1</sup>, Rui Xu<sup>1</sup>  
and Yue Yang<sup>1,\*</sup>

<sup>1</sup> School of Minerals Processing and Bioengineering, Central South University, Changsha 410083, PR China

<sup>2</sup> Faculty of Materials Metallurgy and Chemistry, Jiangxi University of Science and Technology, Ganzhou 341000, China

\* Corresponding author: Eric1911@126.com

# Author contributed equally to this work

## The XRD pattern and composition of the spent $\text{LiFePO}_4$ cathode material

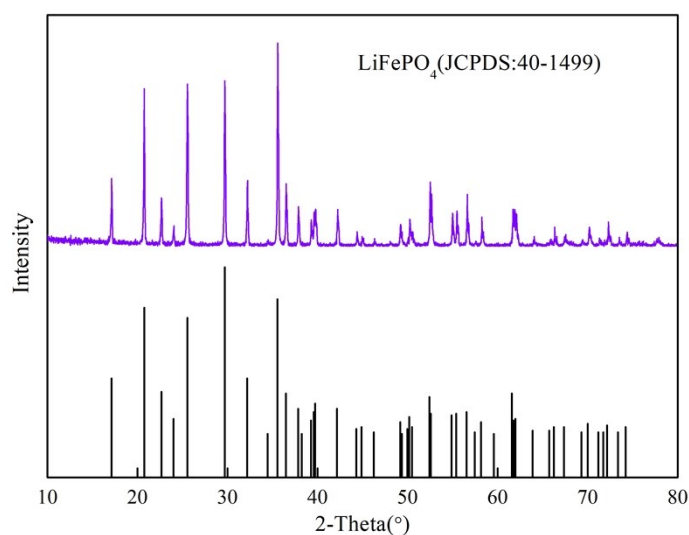

**Fig. S1** The XRD pattern of the spent  $\text{LiFePO}_4$  cathode material

**Table S1** The main composition of the spent  $\text{LiFePO}_4$  cathode material

| Content            | Li  | Fe   | P    | Al   |
|--------------------|-----|------|------|------|
| Composition (wt.%) | 3.6 | 30.5 | 17.3 | 0.01 |

## Reaction happens in solution

**Table S2** Reaction happens in Li-P-Fe-H<sub>2</sub>O system<sup>1, 2</sup>

| No.    | Reactions                                                                                                        |
|--------|------------------------------------------------------------------------------------------------------------------|
| Eq.S1  | $\text{Li}_3\text{PO}_4 + 2\text{H}^+ = \text{LiH}_2\text{PO}_4 + 2\text{Li}^+$                                  |
| Eq.S2  | $\text{Li}_3\text{PO}_4 + 2\text{H}^+ = \text{H}_2\text{PO}_4^- + 3\text{Li}^+$                                  |
| Eq.S3  | $\text{Li}_3\text{PO}_4 + 4\text{H}^+ + 2\text{e} = \text{LiH}_2\text{PO}_3 + \text{H}_2\text{O} + 2\text{Li}^+$ |
| Eq.S4  | $\text{Li}_3\text{PO}_4 + 3\text{H}^+ = \text{H}_3\text{PO}_4 + 3\text{Li}^+$                                    |
| Eq.S5  | $\text{LiH}_2\text{PO}_4 + 2\text{H}^+ + 2\text{e} = \text{LiH}_2\text{PO}_3 + \text{H}_2\text{O}$               |
| Eq.S6  | $\text{LiOH} + \text{H}^+ = \text{Li}^+ + \text{H}_2\text{O}$                                                    |
| Eq.S7  | $\text{Fe}^{3+} + \text{e} = \text{Fe}^{2+}$                                                                     |
| Eq.S8  | $\text{FePO}_4 + 2\text{H}^+ = \text{Fe}^{3+} + \text{H}_2\text{PO}_4^-$                                         |
| Eq.S9  | $\text{FePO}_4 + 3\text{H}^+ = \text{Fe}^{3+} + \text{H}_3\text{PO}_4 + 2\text{H}_2\text{O}$                     |
| Eq.S10 | $\text{FePO}_4 + 2\text{H}^+ + \text{e} = \text{Fe}^{2+} + \text{H}_2\text{PO}_4^-$                              |
| Eq.S11 | $\text{FePO}_4 + 3\text{H}^+ + \text{e} = \text{Fe}^{2+} + \text{H}_3\text{PO}_4$                                |
| Eq.S12 | $\text{Fe}(\text{OH})_3 + 2\text{H}^+ + \text{HPO}_4^{2-} = \text{FePO}_4 + 3\text{H}_2\text{O}$                 |
| Eq.S13 | $\text{Fe}(\text{OH})_3 + \text{H}^+ + \text{e} = \text{Fe}(\text{OH})_2 + \text{H}_2\text{O}$                   |
| Eq.S14 | $\text{Fe}(\text{OH})_3 + 3\text{H}^+ = \text{Fe}^{3+} + 3\text{H}_2\text{O}$                                    |
| Eq.S15 | $\text{Fe}(\text{OH})_2 + 2\text{H}^+ = \text{Fe}^{2+} + 2\text{H}_2\text{O}$                                    |
| Eq.S16 | $2\text{H}^+ + 2\text{e} = \text{H}_2$                                                                           |
| Eq.S17 | $\text{O}_2 + 4\text{e} + 4\text{H}^+ = 2\text{H}_2\text{O}$                                                     |

## Shrinking core model

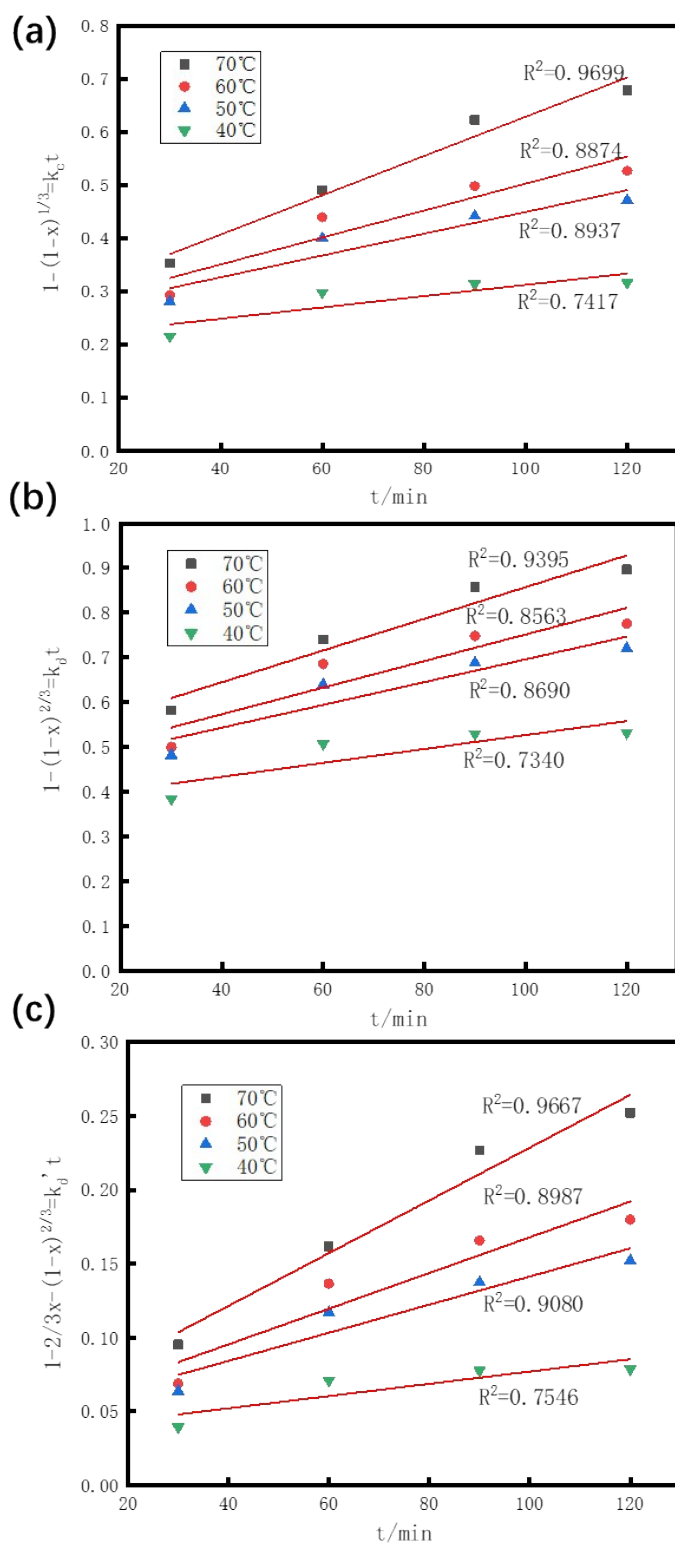

**Fig. S2** Fitting curves of different kinetic equations with shrinking core model

In the study of liquid-solid reaction kinetics, the most widely used is the shrinking core model. The reaction consists of five steps: 1) The acid diffuses to the surface of the

solid particles; 2) The acid diffuses inside the product layer; 3) The acid reacts with the reaction nucleus at the reaction interface; 4) The product diffuses inside the product layer; 5) Product Diffusion from the product layer to the outside. Among them, the first and fifth steps are the external diffusion control step, the second and fourth steps are the internal diffusion control step, and the third step is the chemical reaction control step. The reaction kinetics equation of the chemical reaction control model is shown in Eq. S18. The diffusion control model is divided into external diffusion control model and internal diffusion control model, the reaction kinetic equations are as shown in Eq. S19 and Eq.S20, respectively.<sup>3, 4</sup>

$$1 - (1 - x)^{\frac{1}{3}} = k_c t \quad (\text{Eq.S18})$$

$$1 - (1 - x)^{\frac{2}{3}} = k_d t \quad (\text{Eq.S19})$$

$$1 - \frac{2}{3}x - (1 - x)^{\frac{2}{3}} = k_d' t \quad (\text{Eq.S20})$$

Where  $x$  is the metal leaching rate at the corresponding time  $t$  (min);  $k_c$  is the chemical reaction rate constant;  $k_d$  and  $k_d'$  are the external diffusion reaction rate constant and internal diffusion reaction rate constant, respectively. Taking  $\text{Li}^+$  as an example, the leaching efficiency is fitted according to the above equation, and the result is shown in Fig.S2. It can be seen from Fig.S2 that for the reaction kinetic equations (Eq.S18-S20), the fitting degree  $R^2$  varies from 0.7 to 0.97, and the average fitting degree is not high, which may be due to leaching process is accompanied by other redox reactions.<sup>3, 4</sup>

## The peak dates of Fe2p and C1s

**Table S3** the peak datas of Fe2p <sup>5-8</sup>

| Name          | Peak BE | Height CPS | Height ratio | Area CPS.eV | Area ratio | FWHM fit parameter | L/G Mix(%) product | Tail max(%)  | Tail height(%) | Tail exponent (%) | Valence | Ratio |
|---------------|---------|------------|--------------|-------------|------------|--------------------|--------------------|--------------|----------------|-------------------|---------|-------|
| Fe2p 3 Scan A | 708.46  | 1422.30    | 0.27         | 2582.30     | 0.32       | 1.74               | 30.00 fixed        | 100.00 fixed | 0.00 fixed     | 0.0000 fixed      | +2      | 7.24  |
| Fe2p 3 Scan B | 709.10  | 5031.96    | 0.94         | 7149.86     | 0.89       | 1.36               | 30.00 fixed        | 100.00 fixed | 0.00 fixed     | 0.0000 fixed      | +2      | 20.14 |
| Fe2p 3 Scan C | 710.24  | 5345.15    | 1.00         | 8016.81     | 1.00       | 1.44               | 30.00 fixed        | 100.00 fixed | 0.00 fixed     | 0.0000 fixed      | +2      | 22.62 |
| Fe2p 3 Scan D | 711.30  | 2847.93    | 0.53         | 4496.22     | 0.56       | 1.52               | 30.00 fixed        | 100.00 fixed | 0.00 fixed     | 0.0000 fixed      | +2      | 12.67 |
| Fe2p 3 Scan E | 715.81  | 1397.91    | 0.26         | 2317.32     | 0.29       | 1.59               | 30.00 fixed        | 100.00 fixed | 0.00 fixed     | 0.0000 fixed      | +2      | 6.56  |
| Fe2p 3 Scan F | 711.15  | 784.01     | 0.15         | 1237.77     | 0.15       | 1.52               | 30.00 fixed        | 100.00 fixed | 0.00 fixed     | 0.0000 fixed      | +3      | 3.39  |
| Fe2p 3 Scan G | 712.13  | 1814.89    | 0.34         | 2435.50     | 0.30       | 1.29               | 30.00 fixed        | 100.00 fixed | 0.00 fixed     | 0.0000 fixed      | +2      | 6.79  |
| Fe2p 3 Scan H | 713     | 1240.14    | 0.23         | 1664.21     | 0.21       | 1.29               | 30.00 fixed        | 100.00 fixed | 0.00 fixed     | 0.0000 fixed      | +3      | 4.75  |
| Fe2p 3 Scan I | 714.82  | 908.98     | 0.17         | 1219.81     | 0.15       | 1.29               | 30.00 fixed        | 100.00 fixed | 0.00 fixed     | 0.0000 fixed      | +3      | 3.39  |

|      |   |       |        |      |        |      |      |       |        |       |        |    |      |
|------|---|-------|--------|------|--------|------|------|-------|--------|-------|--------|----|------|
| Fe2p | 3 | 713.9 | 1789.6 | 0.33 | 3531.8 | 0.44 | 1.89 | 30.00 | 100.00 | 0.00  | 0.0000 | +2 | 9.95 |
| Scan | 1 | 9     |        | 7    |        |      |      | fixed | fixed  | fixed | fixed  |    |      |
| I    |   |       |        |      |        |      |      |       |        |       |        |    |      |
| Fe2p | 3 | 717.2 | 507.97 | 0.1  | 882.16 | 0.11 | 1.67 | 30.00 | 100.00 | 0.00  | 0.0000 | +3 | 2.49 |
| Scan | 8 |       |        |      |        |      |      | fixed | fixed  | fixed | fixed  |    |      |
| I    |   |       |        |      |        |      |      |       |        |       |        |    |      |

**Table S4** the peak datas of C1s <sup>6-8</sup>

| Name | Peak BE | Height CPS | Height ratio | Area CPS.eV | Area ratio | FWHM fit param(ev) | L/G Mix(%) product | Tail max(%) | Tail height(%) | Tail exponent (%) |
|------|---------|------------|--------------|-------------|------------|--------------------|--------------------|-------------|----------------|-------------------|
| C1s  | 284.60  | 32066.78   | 1.00         | 45406.64    | 1.00       | 1.36               | 30.00              | 100.00      | 0.00           | 0.0000            |
|      | C-C     |            |              |             |            | 0.5 : 3.5          | fixed              | fixed       | fixed          | fixed             |
| C1s  | 285.54  | 6685.48    | 0.21         | 22487.68    | 0.50       | 3.23               | 30.00              | 100.00      | 0.00           | 0.0000            |
| Scan | C-O-C   |            |              |             |            | 0.5 : 3.5          | fixed              | fixed       | fixed          | fixed             |
| A    |         |            |              |             |            |                    |                    |             |                |                   |
| C1s  | 288.60  | 1537.45    | 0.05         | 3173.90     | 0.07       | 1.98               | 30.00              | 100.00      | 0.00           | 0.0000            |
| Scan | O-C=O   |            |              |             |            | 0.5:3.5            | fixed              | fixed       | fixed          | fixed             |
| B    |         |            |              |             |            |                    |                    |             |                |                   |

## Economic analysis

**TableS5** The cost to treat 1 ton of spent LiFePO<sub>4</sub> batteries

|                              | Items                          | Price    | Dosage | Total           |
|------------------------------|--------------------------------|----------|--------|-----------------|
|                              |                                | \$/t     | t      | \$              |
| <b>Acid leaching</b>         | H <sub>2</sub> SO <sub>4</sub> | 76.1265  | 1.57   | 119.519         |
|                              |                                | \$/kWh   | kWh    | \$              |
|                              | Energy cost                    | 0.07     | 380    | 26.6            |
|                              |                                | \$/t     | t      | \$              |
| <b>Hydrothermal reaction</b> | LiOH                           | 6743.792 | 0.120  | 809.255         |
|                              | FeSO <sub>4</sub>              | 4435.753 | 0.024  | 106.458         |
|                              | Glucose                        | 520.054  | 0.030  | 15.602          |
|                              |                                | \$/kWh   | kWh    | \$              |
|                              | Energy cost                    | 0.07     | 490    | 34.3            |
| <b>Cost</b>                  |                                |          |        | <b>1111.733</b> |

### Calculation of costs:

(a) **The cost of raw materials.** The cost of spent LiFePO<sub>4</sub> battery is calculated at \$306.536 /ton.

**(b) The cost of reagents.** According to the price and dosage of the reagents listed in Table S5, the cost of reagents for the recovery process is calculated as follow.

1- acid leaching:

$$\$76.1265/t * 1.57 t = \$119.519$$

2-hydrothermal reaction:

$$\$6743.792 /t * 0.12 t + \$4435.753 /t * 0.024 t + \$520.054 /t * 0.03 t = \$931.315$$

**(c) The cost of energy.** According to Table S5, the cost of energy for the recovery process is calculated as follow.

1- acid leaching:

$$\$0.07 /kW\cdot h * 380 kW\cdot h = \$26.6$$

2-hydrothermal reaction:

$$\$0.07 /kW\cdot h * 490 kW\cdot h = \$34.3$$

**The cost to treat 1 ton of spent LiFePO<sub>4</sub> batteries:**

$$\$119.519 + \$26.6 + \$931.315 + \$34.3 = \$1111.733$$

**The total costs:**

$$\$1111.733 + \$306.536 = \$1418.269$$

**Calculation of benefits and profits:** When recycling of 1 ton of spent LiFePO<sub>4</sub> battery, 372.88 kg LiFePO<sub>4</sub> can be obtained and 1 ton of LiFePO<sub>4</sub> is 7283.29\$, the benefits and profits are calculated as follows.

**Benefits:**

$$7283.29 \$/t * 372.88 kg = \$2715.793$$

**Profits:**

$$\$2715.793 - \$1418.269 = \$1297.524$$

**Table S6** The comparison of different methods for recycling of spent LFP cathode material

| Method                                     | Chemicals consumption                                                                                                                                                                             | Energy Consumption                                                                                                                                                                                                  | Waste production                                                                                                                                                                                        | Product                                                                     | Ref.      |
|--------------------------------------------|---------------------------------------------------------------------------------------------------------------------------------------------------------------------------------------------------|---------------------------------------------------------------------------------------------------------------------------------------------------------------------------------------------------------------------|---------------------------------------------------------------------------------------------------------------------------------------------------------------------------------------------------------|-----------------------------------------------------------------------------|-----------|
| Acid leaching and hydrothermal synthesis   | 2 M H <sub>2</sub> SO <sub>4</sub> , glucose, LiOH and FeSO <sub>4</sub> according to the absence in leaching solution                                                                            | <ul style="list-style-type: none"> <li>✓ Leaching: 70 °C for 2h</li> <li>✓ Hydrothermal synthesis: 200 °C for 6h</li> <li>✓ Calcination: 200 °C for 6h</li> </ul>                                                   | <ul style="list-style-type: none"> <li>✓ Salt-containing wastewater</li> <li>✓ Graphite residue</li> </ul>                                                                                              | LiFePO <sub>4</sub>                                                         | This work |
| Sulfuric acid leaching                     | 0.3 M H <sub>2</sub> SO <sub>4</sub> , H <sub>2</sub> O <sub>2</sub> (H <sub>2</sub> O <sub>2</sub> /Li molar ratio 2.07), NaOH and Na <sub>3</sub> PO <sub>4</sub> (The amount is not mentioned) | <ul style="list-style-type: none"> <li>✓ Leaching: 60 °C for 2h</li> <li>✓ FePO<sub>4</sub> preparation: 600 °C for 4h</li> <li>✓ Li<sub>3</sub>PO<sub>4</sub> preparation: concentration by evaporation</li> </ul> | <ul style="list-style-type: none"> <li>✓ CO<sub>2</sub>: C remove from leaching residue to purify FePO<sub>4</sub></li> <li>✓ Sediment: Mixture of Al(OH)<sub>3</sub> and Fe(OH)<sub>3</sub></li> </ul> | FePO <sub>4</sub><br>Li <sub>3</sub> PO <sub>4</sub>                        | 9         |
| Oxidizing leaching                         | 1.05 times theoretical amount of Na <sub>2</sub> S <sub>2</sub> O <sub>8</sub>                                                                                                                    | <ul style="list-style-type: none"> <li>✓ Li<sub>2</sub>CO<sub>3</sub> preparation: concentration by evaporation</li> </ul>                                                                                          | <ul style="list-style-type: none"> <li>✓ Na<sub>2</sub>SO<sub>4</sub> solution</li> <li>✓ Aluminum slag</li> </ul>                                                                                      | FePO <sub>4</sub><br>Li <sub>2</sub> CO <sub>3</sub>                        | 2         |
| Organic acid leaching                      | 0.8 mol·L <sup>-1</sup> CH <sub>3</sub> COOH, 6 vol% H <sub>2</sub> O <sub>2</sub> , NaOH and saturation Na <sub>2</sub> CO <sub>3</sub> solution                                                 | <ul style="list-style-type: none"> <li>✓ Leaching: 60 °C for 0.5 h</li> <li>✓ Li<sub>2</sub>CO<sub>3</sub> preparation: concentration by evaporation</li> </ul>                                                     | <ul style="list-style-type: none"> <li>✓ CH<sub>3</sub>COONa solution</li> <li>✓ Fe(OH)<sub>3</sub> precipitation</li> </ul>                                                                            | FePO <sub>4</sub><br>Li <sub>2</sub> CO <sub>3</sub>                        | 10        |
| Molten salt Method                         | 0.5 M H <sub>3</sub> PO <sub>4</sub>                                                                                                                                                              | <ul style="list-style-type: none"> <li>✓ Molten salt reaction: 750 °C under an Ar atmosphere</li> </ul>                                                                                                             | <ul style="list-style-type: none"> <li>✓ CO<sub>2</sub> emission in Molten salt reaction</li> <li>✓ Na<sub>3</sub>PO<sub>4</sub> solution</li> </ul>                                                    | Fe/Fe <sub>3</sub> O <sub>4</sub> powder<br>Li <sub>3</sub> PO <sub>4</sub> | 11        |
| Repair by solid-state annealing            | Li <sub>2</sub> CO <sub>3</sub> according to the absence of lithium of spent cathode material, NaOH solution                                                                                      | <ul style="list-style-type: none"> <li>✓ 600~800 °C for 1 h</li> </ul>                                                                                                                                              | <ul style="list-style-type: none"> <li>✓ Aluminum-containing alkaline waste liquid</li> </ul>                                                                                                           | LiFePO <sub>4</sub>                                                         | 12        |
| Repair by relithiation and short annealing | 0.2 M LiOH, 0.08 M citric acid, Li <sub>2</sub> CO <sub>3</sub> , Dimethyl carbonate (DMC) and N-Methyl-2-pyrrolidone (NMP)                                                                       | <ul style="list-style-type: none"> <li>✓ Relithiation: 80 °C for 5 h</li> <li>✓ Annealing: 600 °C for 2 h</li> </ul>                                                                                                | <ul style="list-style-type: none"> <li>✓ Salt-containing wastewater</li> </ul>                                                                                                                          | LiFePO <sub>4</sub>                                                         | 13        |



## **References**

- (1) X. Chen; J. Li, D. Kang, T. Zhou, H. Ma, *Green Chem.*, 2019, 21, 6342–6352.
- (2) J. Zhang, J. Hu, Y. Liu, Q. Jing, C. Yang, Y. Chen, C. Wang, *ACS Sustain. Chem. Eng.*, 2019, 7, 5626–5631.
- (3) P. Meshram, B. Pandey, T. Mankhand, *Chem. Eng. J.*, 2015, 281, 418–427.
- (4) X. Zhang, L. Li, E. Fan; Q. Xue, Y. Bian, F. Wu, R. Chen, *Chem. Soc. Rev.*, 2018, 47, 7239-7302.
- (5) C. Biesinger, B. Payne, P. Grosvenor, L. Lau, R. Gerson, R. Smart, *Appl. Surf. Sci.*, 2011, 257, 2717–2730.
- (6) X. Wang, Z. Feng, J. Huang, W. Deng, X. Li, H. Zhang, Z. Wen, *Carbon*, 2018, 127, 149-157.
- (7) Y. Zhang, A. Alarco, A. Nerkar, S. Best, A. Snook, C. Talbot, C. Cowie, *ACS Appl. Energy Mater.*, 2020, 3, 9158-9167.
- (8) A. Fedorkova, R. Orinakova, A. Orinak, M. Kupkova, D. Wiemhofer, N. Audinot, J. Guillot, *Solid State Sci.*, 2012, 14, 1238-1243.
- (9) H. Li, S. Xing, Y. Liu, F. Li, H. Guo, G. Kuang, *ACS Sustain. Chem. Eng.*, 2017, 5, 8017–8024.
- (10) Y. Yang, X. Meng, H. Cao, X. Lin, C. Liu, Y. Sun, Y. Zhang, Z. Sun, *Green Chem.*, 2018, 20, 3121–3133.
- (11) B. Zhang, X. Qu, J. Qu, X. Chen, H. Xie, P. Xing, D. Wang, H. Yin, *Green Chem.*, 2020, 22, 8633–8641
- (12) J. Chen, Q. Li, J. Song, D. Song, L. Zhang, X. Shi, *Green Chem.*, 2016, 18, 2500–2506.
- (13) P. Xu, Q. Dai, H. Gao, H. Liu, M. Zhang, M. Li, Y. Chen, K. An, Y. Meng, P. Liu, Y. Li, J. Spangenberg, L. Gaines, J. Lu, Z. Chen. *Joule* 2020, 4, 2609-2626.
